# Supplementary material for: The fate of O + ions observed in the plasma mantle: particle tracing modelling and cluster observations
Source: Copernicus journal article supplement (doi:10.5194/angeo-38-645-2020), 2020-06-03
Supplement: Supplementary file [file angeo-38-645-2020-supplement-title-page.pdf › angeo-38-645-2020-supplement-title-page.pdf]

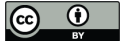

## *Supplement of*

# **The fate of $O^+$ ions observed in the plasma mantle: particle tracing modelling and cluster observations**

**Audrey Schillings et al.**

*Correspondence to:* Audrey Schillings (audrey.schillings@irf.se)

- [angeo-38-645-2020-supplement-title-page.pdf](#)
- [ham\\_on\\_zenodo 2](#)
  - PlasmaMantle.dat
  - README
  - collection.fpp
  - ham.fpp
  - inpuham.m
  - m\_files
    - \* ham2mat.m
    - \* hamfieldplot.m
    - \* hamtrajectoryplot.m
    - \* klot.m
  - makefile

The copyright of individual parts of the supplement might differ from the CC BY 4.0 License.
